# Supplementary material for: Genomic Hotspots for Adaptation: The Population Genetics of Müllerian Mimicry in Heliconius erato
Source: PubMed Central journal article supplement (PMC2816678; doi:10.1371/journal.pgen.1000796), 2010-02-05

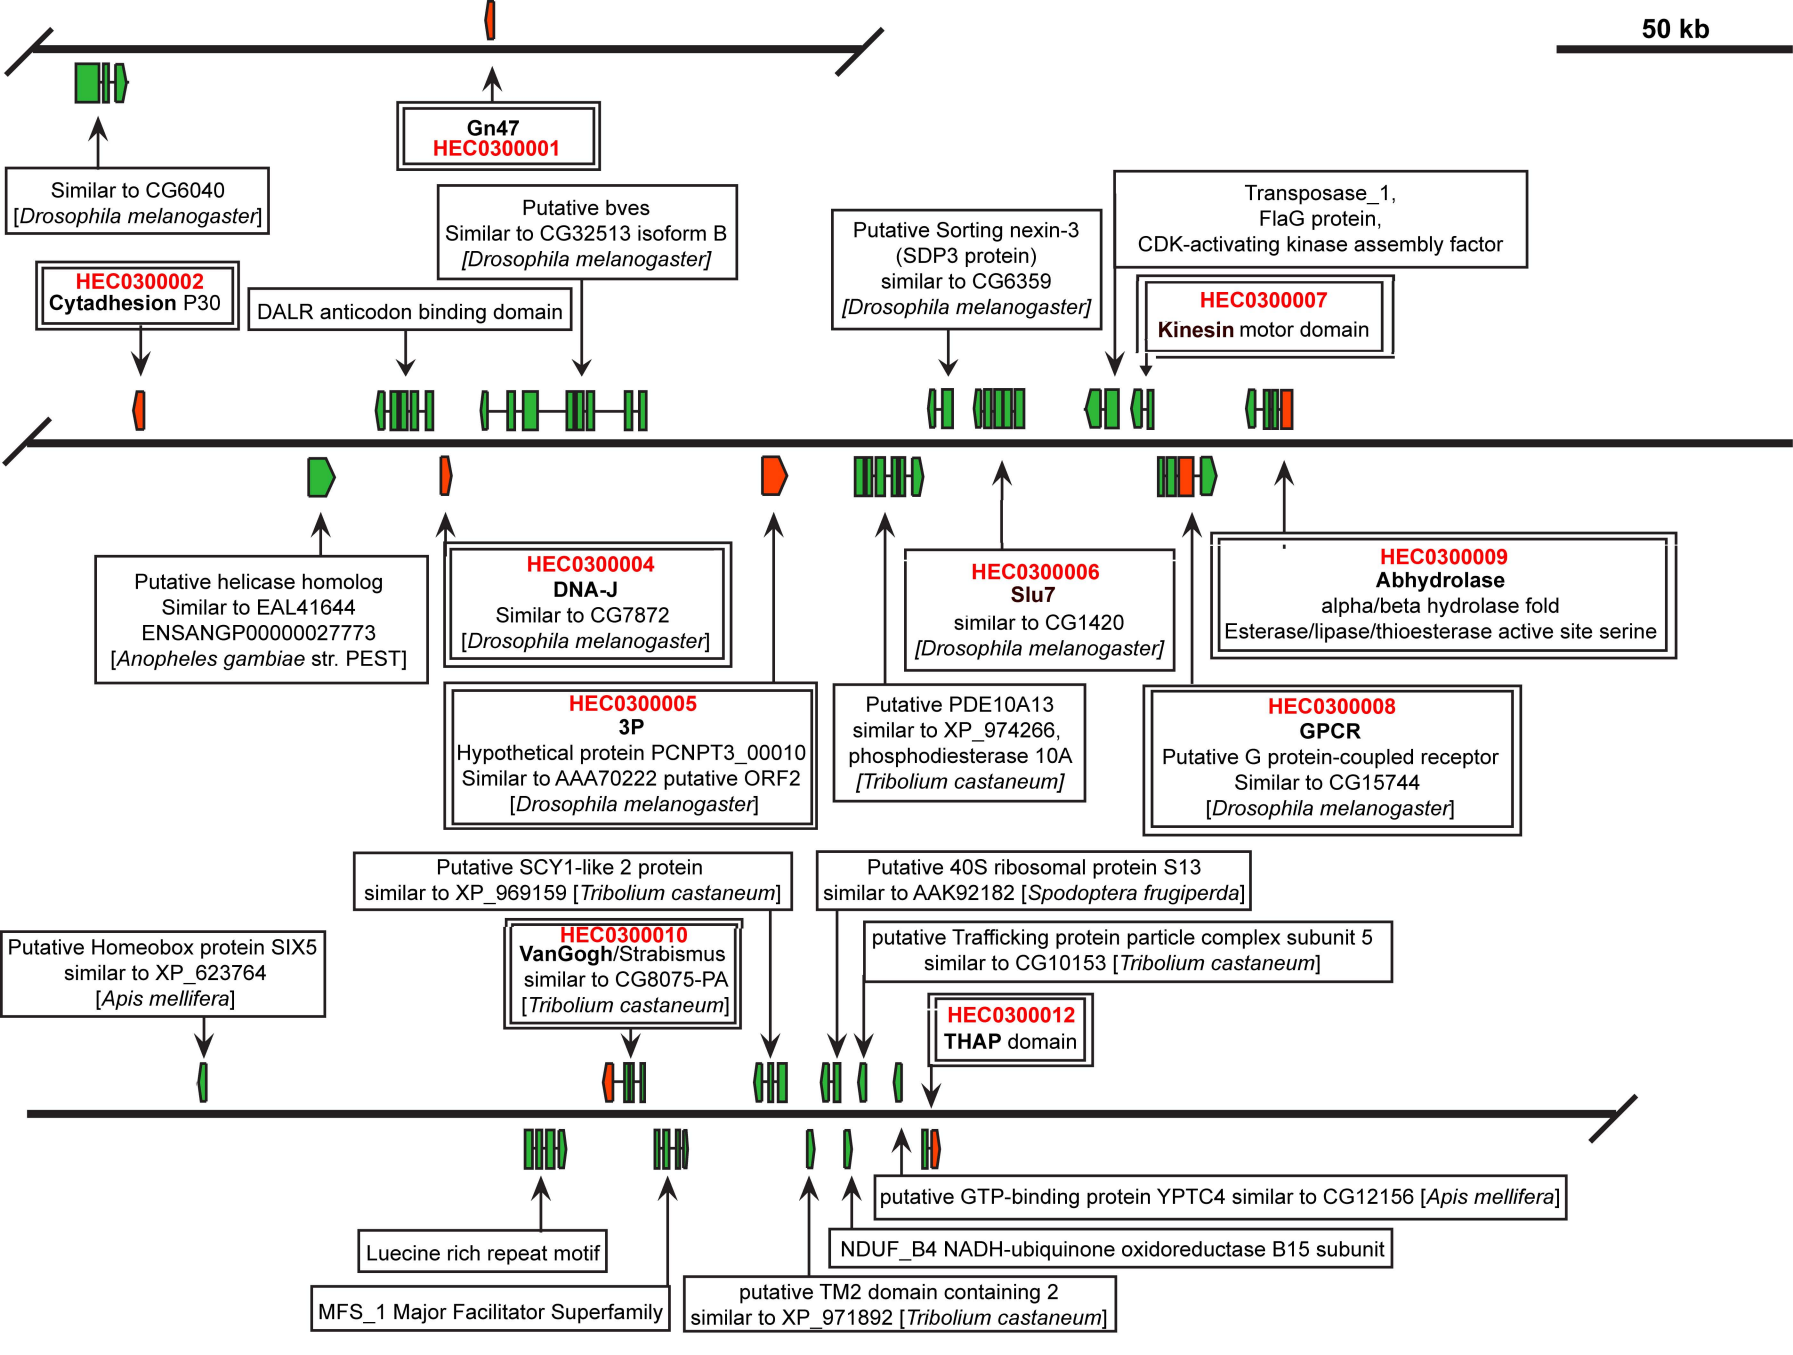

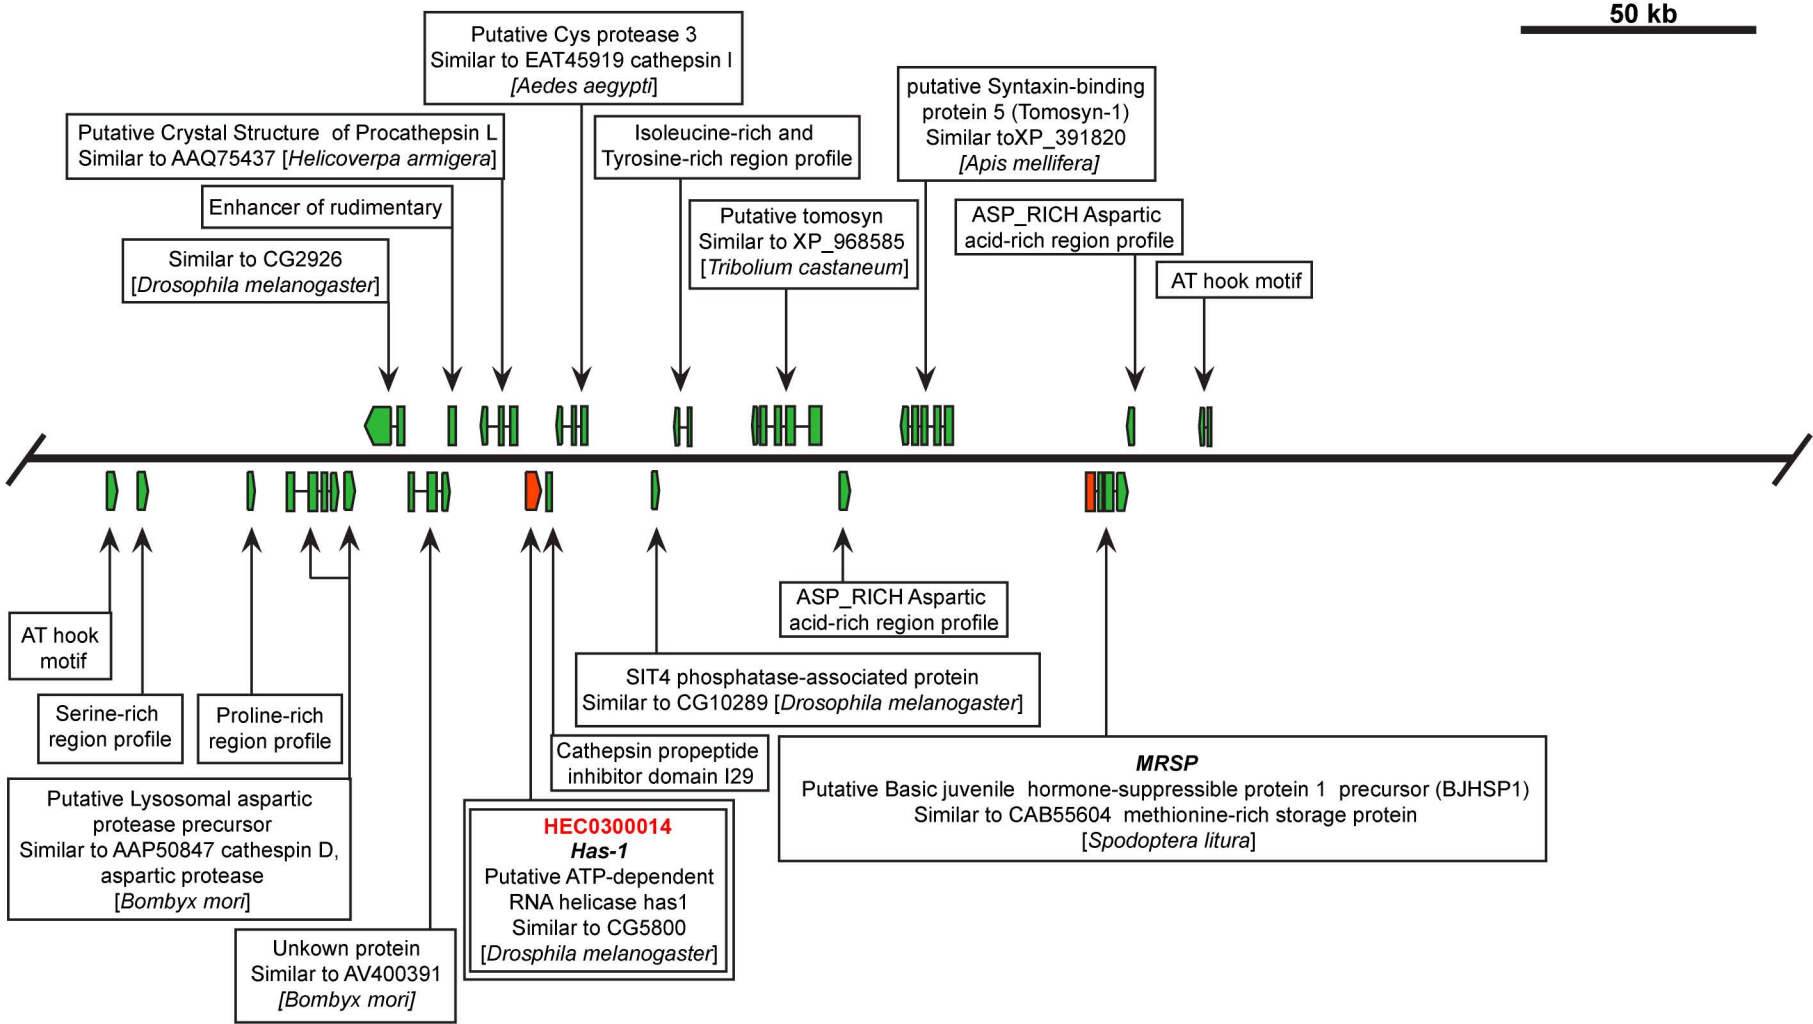

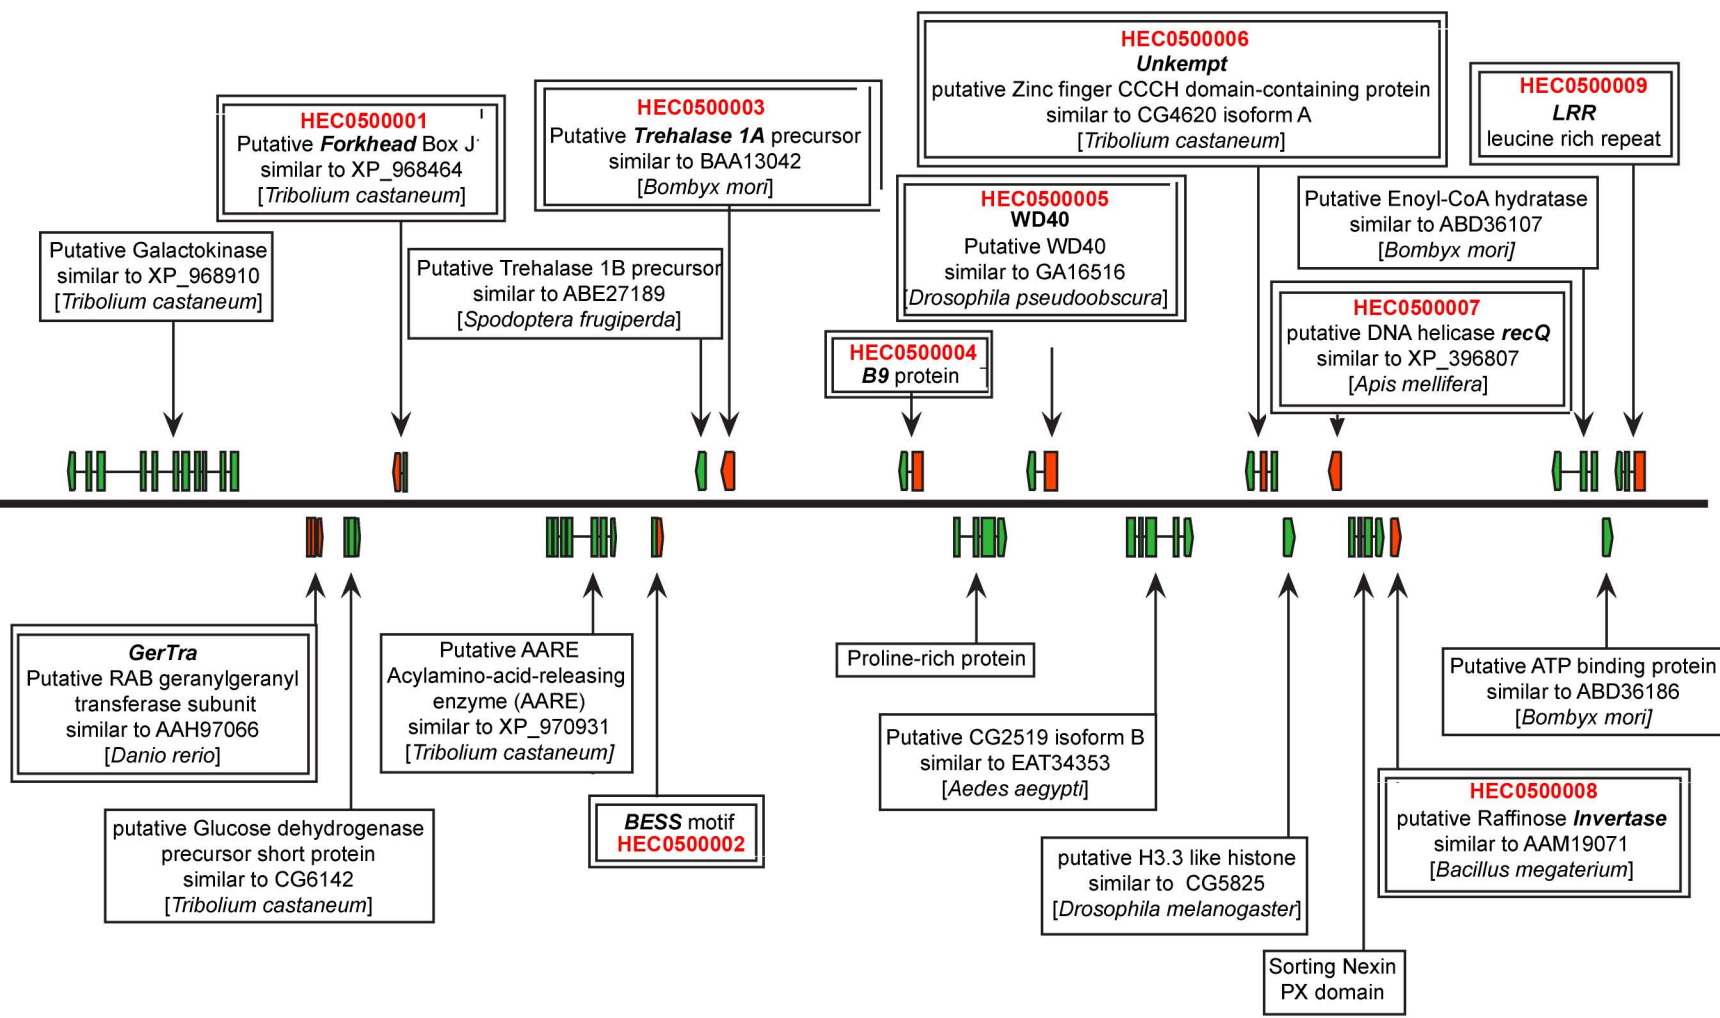

Supplement: pgen.1000796.s002.pdf [file pgen.1000796.s002.pdf]
