# Supplementary material for: Genomic Hotspots for Adaptation: The Population Genetics of Müllerian Mimicry in Heliconius erato
Source: PubMed Central journal article supplement (PMC2816678; doi:10.1371/journal.pgen.1000796), 2010-02-05
Supplement: pgen.1000796.s003.pdf [file pgen.1000796.s003.pdf]

| Locus tag            | HE gene number | HM gene number | LG <sup>A</sup> | Brood <sup>E</sup> | Pop <sup>C</sup> | Probe <sup>D</sup> | Pos <sup>E</sup> | Primer                                               | Intron | GB Acc.G      |
|----------------------|----------------|----------------|-----------------|--------------------|------------------|--------------------|------------------|------------------------------------------------------|--------|---------------|
| <i>Gn47</i>          | HEC0300001     | -              | HEC03           | yes                | no               | yes                | 1                | GACGCGTGAAGAAATTC AATTCCG<br>GTACAACACGCGACTGTTGTGAG | yes    | in submission |
| <i>Cytadhesion</i>   | HEC0300002     | -              | HEC03           | no                 | yes              | yes                | 91,726           | GGCCTATACCCAACGTTGAG<br>AGCGTAGTACCAATACCCAATG       | no     | in submission |
| <i>Gn12</i>          | HEC0300003     | -              | HEC03           | yes                | no               | no                 | 109,416          | GGATTGTCAGTCGCAAGTCA<br>GGATTCGCGGTGAACTAAG          | yes    | in submission |
| <i>Dna-J</i>         | HEC0300004     | HM01006        | HEC03           | yes                | yes              | yes                | 165,009          | GTGCTCGGTGTCACAAGAGA<br>CTTCCAAAGCCATCTTGCAT         | no     | in submission |
| <i>3P</i>            | HEC0300005     | -              | HEC03           | no                 | yes              | no                 | 237,736          | GCCATTTCTATCTGCATACC<br>CAACCATCGCTTTTAGTC           | yes    | in submission |
| <i>Slu7-exon9</i>    | HEC0300006     | HM01019        | HEC03           | no                 | yes              | no                 | 283,611          | AAGCTCTGAAAGCAGTTCCGAC<br>TTAACATGCCTTCTTCAGTTTG     | no     | in submission |
| <i>Slu7-exon2</i>    | HEC0300006     | HM01019        | HEC03           | no                 | yes              | no                 | 287,640          | GGAGCAAATTCACAAGTGCAG<br>TCTTGGCTCTCAATTCCCT         | no     | in submission |
| <i>kinesin</i>       | HEC0300007     | HM01018        | HEC03           | no                 | yes              | no                 | 299,335          | TTTATTGAACCTAGGCCACC<br>AGTTAAGTCTATCAGCACCTCT       | no     | in submission |
| <i>GPCR</i>          | HEC0300008     | HM01017        | HEC03           | yes                | yes              | yes                | 309,248          | GTTACACATGCCCGGTGATAA<br>CGTCTCTCAGCCTCATTG          | no     | in submission |
| <i>Abhydrolase</i>   | HEC0300009     | -              | HEC03           | no                 | yes              | yes                | 322,422          | GCCATAAATCAACTGTTTCTG<br>GGTTTGTGGCAAGTAATCC         | yes    | in submission |
| <i>VanGogh</i>       | HEC0300010     | HM01038        | HEC03           | yes                | yes              | yes                | 513,028          | TAGCTTGTGCCTTCTCTGAGA<br>GGGATGGGCAAGAAGTTA          | no     | in submission |
| <i>Gene 6</i>        | HEC0300011     | -              | HEC03           | no                 | yes              | yes                | 517,433          | AAGACTTGTACGAATGGCACCT<br>AAGCTCCGAAATCAGAAGA        | no     | in submission |
| <i>THAP</i>          | HEC0300012     | -              | HEC03           | yes                | yes              | yes                | 552,580          | TACCAAAGCAATGATGAACG<br>AGCTCAACGACACTTTACAGGA       | no     | in submission |
| <i>Gene 18</i>       | HEC0300013     | -              | HEC03           | no                 | yes              | no                 | 579,264          | AACGACCGAGCACCTACCATTA<br>GTCTTCTAAAAGTCCCATCGC      | no     | in submission |
| <i>Has1</i>          | HEC0300014     | -              | HEC03           | yes                | yes              | yes                | 1,442,402        | CTAGAAGCCAAATCTGTCGCAAAT<br>TTCAGGTCGTGCCACATGA      | no     | in submission |
| <i>D23/24</i>        | -              | -              | HEC03           | yes                | no               | no                 | 1,751,244        | AGTACTAAGTCTGAGCACGTGTGA<br>CCATTCTAAGCACCGATAACA    | NA     | in submission |
| <i>Forkhead</i>      | HEC0500001     | -              | HEC05           | no                 | yes              | no                 | 1                | TTGCGCTAAATTAATAAAACGGTA<br>TCATCATGCACATAACATCAGG   | no     | in submission |
| <i>BESS</i>          | HEC0500002     | -              | HEC05           | no                 | yes              | no                 | 54,672           | GAACTCCGACAGCGTTTCAG<br>ATTCTACGGAGCCCTCCAC          | no     | in submission |
| <i>Trehalase (A)</i> | HEC0500003     | HM00004        | HEC05           | no                 | yes              | no                 | 66,809           | TGTACTCTCCACCACCACCA                                 | no     | in submission |

|                      |            |         |       |     |     |     |         |                                                    |     |               |
|----------------------|------------|---------|-------|-----|-----|-----|---------|----------------------------------------------------|-----|---------------|
|                      |            |         |       |     |     |     |         | AGATTACCCTGGCGGTATCC                               |     |               |
| <i>Trehalase (B)</i> | HEC0500003 | HM00004 | HEC05 | no  | yes | no  | 67,583  | CGGTCCTGCTGGTTCTATTC<br>TGCCATATTTTGAAGAGCATTT     | no  | in submission |
| <i>B9</i>            | HEC0500004 | HM00007 | HEC05 | yes | yes | yes | 104,621 | CGGGAATCTGAAGTAACAAA<br>ACTAGCTGAGGCCCTATTA        | no  | in submission |
| <i>WD40</i>          | HEC0500005 | HM00010 | HEC05 | no  | yes | no  | 130,877 | ATTATAAGCAGCTATCCACGC<br>AAAGCAGCCGACCAAC          | no  | in submission |
| <i>Unkempt</i>       | HEC0500006 | HM00013 | HEC05 | no  | yes | no  | 177,423 | CTGCAGCGGCGTCTGACAGTAG<br>CACCGTGCTGCAAGAGGTC      | no  | in submission |
| <i>RecQ</i>          | HEC0500007 | HM00017 | HEC05 | yes | yes | no  | 190,761 | TGCTACAGCTCATGTTCTGTCTG<br>CCTTTTGTCTGAATGGAAGTGGT | no  | in submission |
| <i>Invertase</i>     | HEC0500008 | -       | HEC05 | yes | yes | no  | 201,977 | CCCATCTATCACATAACCGCTCCT<br>CCGAGCCACGCGATAAGAA    | no  | in submission |
| <i>LRR</i>           | HEC0500009 | HM00024 | HEC05 | yes | yes | yes | 249,391 | CGTGAAGTACCGACTGTTGTAC<br>CATAATTTCTCAGGGAGCATA    | no  | in submission |
| <i>Gn71</i>          | HEC0500010 | -       | HEC05 | yes | no  | no  | 292,390 | TATTGCGAGTTGAGCTGTGG<br>ATGCGCCATTTCCAGTTAAG       | yes | in submission |
| <i>HEAT</i>          | HEC0500011 | -       | HEC05 | yes | no  | no  | ~500000 | CACTTTCGGAACGGATCAGT<br>CGCGGTGCACTCGAACAATAT      | no  | in submission |
| <i>RNU3</i>          | HEC0500012 | -       | HEC05 | yes | no  | no  | ~650000 | CGTCTAACCTCGAAAATG<br>GTGCTCCTGCCCTATAGCTG         | no  | in submission |
| <i>Caspase</i>       | -          | -       | HEM20 | no  | yes | no  | NA      | AATGCCTGTGGAAGAAACG<br>ACCAGAGGGTGTGTCAGGCTTA      | no  | in submission |
| <i>SUZ12</i>         | -          | -       | HEM07 | no  | yes | no  | NA      | ACGAGTTCACGGATGTCA<br>ATATGGAGGACCGTTTGC           | no  | in submission |
| <i>Wingless</i>      | -          | -       | HEM01 | no  | yes | no  | NA      | CCCAGTTTTAGATCTGTCTG<br>TCTCGGTCCGGTATCCGCG        | no  | in submission |

A = linkage group for each marker from [33-35]; B = locus used in pedigree-based linkage mapping; C = locus used for population sampling; D = locus used for BAC library probing; E = approximate location of locus along BAC tile path; F = forward and reverse primers used for PCR amplification and sequencing; G = Genbank accession numbers.
