# Supplementary material for: Genomic Hotspots for Adaptation: The Population Genetics of Müllerian Mimicry in Heliconius erato
Source: PubMed Central journal article supplement (PMC2816678; doi:10.1371/journal.pgen.1000796), 2010-02-05
Supplement: pgen.1000796.s005.pdf [file pgen.1000796.s005.pdf]

| <b>Gene</b>           | <b>Primer Name</b> | <b>Primer Sequence</b> | <b>Amplified size (bp)</b> | <b>Intron size (bp)</b> |
|-----------------------|--------------------|------------------------|----------------------------|-------------------------|
| <b><i>DnaJ</i></b>    | DNAJ_HH_F2         | GTGCTCGGTGTCACAAGAGA   | 142                        | none                    |
|                       | DNAJ_HH_R3         | CGGTGGCGATACGATTAAG    |                            |                         |
| <b><i>GPCR</i></b>    | GPCR_HH_F          | GAGGGCACAGAGCTAAGGAT   | 126                        | 589                     |
|                       | GPCR_HH_R          | TCTAGGAGTTGACCGTGCAT   |                            |                         |
| <b><i>kinesin</i></b> | kinesin_HH_F7      | TTGGGACATACAGCCTTTTCG  | 171                        | 814                     |
|                       | kinesin_HH_R7      | CGCCTGAGAAGAATGACAATG  |                            |                         |
| <b><i>Slu7</i></b>    | Slu7_HH_E1MOD_F1   | CGTGGAGCCATGACTCATAA   | 98                         | 773                     |
|                       | Slu7_HH_E1E2_R1    | TTGAATTCATCAGGAGCTATGC |                            |                         |
| <b><i>VanGogh</i></b> | VanGogh_HH_F4      | CGCTCGCTAGAGCCTTACAA   | 130                        | 454                     |
|                       | VanGogh_HH_R4      | GAGATGCGTCTTGGGACAGA   |                            |                         |
| <b><i>EF-1a</i></b>   | EF1a_HH_F5         | TGCCAGTAGGCAGAGTTGAA   | 175                        | none                    |
|                       | EF1a_HH_R5         | AATTCCTTGACGGACACGTT   |                            |                         |
