# Supplementary material for: Genomic Hotspots for Adaptation: The Population Genetics of Müllerian Mimicry in Heliconius erato
Source: PubMed Central journal article supplement (PMC2816678; doi:10.1371/journal.pgen.1000796), 2010-02-05
Supplement: pgen.1000796.s006.pdf [file pgen.1000796.s006.pdf]

| <b>ID</b> | <b>Genus, species, race</b>              | <b>D</b> | <b>Cr</b> | <b>Sd</b> | <b>Collection location</b> |
|-----------|------------------------------------------|----------|-----------|-----------|----------------------------|
| JM0853    | <i>Heliconius erato favorinus</i>        | dd       | crcr      | sdsd      | Tarapoto, Peru             |
| JM1511    | <i>Heliconius erato favorinus</i>        | dd       | crcr      | sdsd      | Tarapoto, Peru             |
| JM1513    | <i>Heliconius erato favorinus</i>        | dd       | crcr      | sdsd      | Tarapoto, Peru             |
| JM1514    | <i>Heliconius erato favorinus</i>        | dd       | crcr      | sdsd      | Tarapoto, Peru             |
| JM1515    | <i>Heliconius erato favorinus</i>        | dd       | crcr      | sdsd      | Tarapoto, Peru             |
| JM1277    | <i>Heliconius erato favorinus</i>        | dd       | crcr      | sdsd      | Tarapoto, Peru             |
| JM1003    | <i>Heliconius erato favorinus</i>        | dd       | crcr      | sdsd      | Rio Pansillo, Peru         |
| JM1004    | <i>Heliconius erato favorinus</i>        | dd       | crcr      | sdsd      | Rio Pansillo, Peru         |
| JM1005    | <i>Heliconius erato favorinus</i>        | dd       | crcr      | sdsd      | Rio Pansillo, Peru         |
| JM1011    | <i>Heliconius erato favorinus</i>        | dd       | crcr      | sdsd      | Rio Pansillo, Peru         |
| JM1298    | <i>Heliconius erato favorinus</i>        | dd       | crcr      | sdsd      | Rio Pansillo, Peru         |
| JM1008    | <i>Heliconius erato favorinus</i>        | dd       | crcr      | sdsd      | Rio Pansillo, Peru         |
| JM1009    | <i>Heliconius erato favorinus</i>        | dd       | crcr      | sdsd      | Rio Pansillo, Peru         |
| JM1010    | <i>Heliconius erato favorinus</i>        | dd       | crcr      | sdsd      | Rio Pansillo, Peru         |
| JM1289    | <i>Heliconius erato favorinus</i>        | dd       | crcr      | sdsd      | Rio Pansillo, Peru         |
| JM0996    | <i>Heliconius erato favorinus</i>        | dd       | crcr      | sdsd      | Rio Pansillo, Peru         |
| JM0997    | <i>Heliconius erato favorinus</i>        | dd       | crcr      | sdsd      | Rio Pansillo, Peru         |
| JM1001    | <i>Heliconius erato favorinus</i>        | dd       | crcr      | sdsd      | Rio Pansillo, Peru         |
| JM1013    | <i>Heliconius erato favorinus</i>        | dd       | crcr      | sdsd      | Rio Pansillo, Peru         |
| JM1364    | <i>Heliconius erato favorinus x emma</i> | DD       | Cr -      | Sdsd      | Pongo de Cainarache , Peru |
| JM1365    | <i>Heliconius erato favorinus x emma</i> | dd       | Cr -      | Sdsd      | Pongo de Cainarache , Peru |
| JM1367    | <i>Heliconius erato favorinus x emma</i> | Dd       | crcr      | Sd -      | Pongo de Cainarache , Peru |
| JM1368    | <i>Heliconius erato favorinus x emma</i> | DD       | Crcr      | Sdsd      | Pongo de Cainarache , Peru |
| JM1369    | <i>Heliconius erato favorinus x emma</i> | dd       | Crcr      | sdsd      | Pongo de Cainarache , Peru |
| JM1370    | <i>Heliconius erato favorinus x emma</i> | DD       | Crcr      | Sd -      | Pongo de Cainarache , Peru |
| JM1371    | <i>Heliconius erato favorinus x emma</i> | dd       | crcr      | Sdsd      | Pongo de Cainarache , Peru |
| JM1372    | <i>Heliconius erato emma</i>             | DD       | Cr -      | Sd -      | Pongo de Cainarache , Peru |
| JM1373    | <i>Heliconius erato favorinus x emma</i> | Dd       | Crcr      | Sdsd      | Pongo de Cainarache , Peru |
| JM1375    | <i>Heliconius erato favorinus x emma</i> | DD       | crcr      | Sd -      | Pongo de Cainarache , Peru |
| JM1376    | <i>Heliconius erato favorinus x emma</i> | Dd       | crcr      | Sd -      | Pongo de Cainarache , Peru |
| JM1377    | <i>Heliconius erato emma</i>             | DD       | Cr -      | Sd -      | Pongo de Cainarache , Peru |
| JM1381    | <i>Heliconius erato favorinus x emma</i> | DD       | Cr -      | Sdsd      | Pongo de Cainarache , Peru |
| JM1382    | <i>Heliconius erato favorinus x emma</i> | DD       | crcr      | Sd -      | Pongo de Cainarache , Peru |
| JM1383    | <i>Heliconius erato favorinus x emma</i> | Dd       | Crcr      | sdsd      | Pongo de Cainarache , Peru |
| JM1384    | <i>Heliconius erato favorinus x emma</i> | Dd       | Cr -      | Sdsd      | Pongo de Cainarache , Peru |
| JM1386    | <i>Heliconius erato favorinus x emma</i> | Dd       | Crcr      | sdsd      | Pongo de Cainarache , Peru |
| JM1411    | <i>Heliconius erato favorinus x emma</i> | dd       | Cr -      | Sdsd      | Pongo de Cainarache , Peru |
| JM1412    | <i>Heliconius erato favorinus x emma</i> | Dd       | Cr -      | Sdsd      | Pongo de Cainarache , Peru |
| JM1413    | <i>Heliconius erato favorinus x emma</i> | DD       | Crcr      | sdsd      | Pongo de Cainarache , Peru |
| JM1642    | <i>Heliconius erato favorinus x emma</i> | dd       | crcr      | Sdsd      | Pongo de Cainarache , Peru |
| JM1643    | <i>Heliconius erato favorinus x emma</i> | Dd       | Cr -      | Sdsd      | Pongo de Cainarache , Peru |
| JM1625    | <i>Heliconius erato emma</i>             | DD       | Cr -      | Sd -      | Barranquitas, Peru         |
| JM1627    | <i>Heliconius erato favorinus x emma</i> | DD       | Cr -      | Sdsd      | Barranquitas, Peru         |
| JM1628    | <i>Heliconius erato emma</i>             | DD       | Cr -      | Sd -      | Barranquitas, Peru         |
| JM1629    | <i>Heliconius erato favorinus x emma</i> | Dd       | Cr -      | Sd -      | Barranquitas, Peru         |
| JM1631    | <i>Heliconius erato favorinus x emma</i> | Dd       | Cr -      | Sd -      | Barranquitas, Peru         |
| JM1632    | <i>Heliconius erato favorinus x emma</i> | DD       | Crcr      | Sd -      | Barranquitas, Peru         |
| JM1634    | <i>Heliconius erato emma</i>             | DD       | Cr -      | Sd -      | Barranquitas, Peru         |
| JM1639    | <i>Heliconius erato favorinus x emma</i> | DD       | Cr -      | Sdsd      | Barranquitas, Peru         |
| JM1641    | <i>Heliconius erato favorinus x emma</i> | Dd       | Cr -      | Sdsd      | Barranquitas, Peru         |
| JM1694    | <i>Heliconius erato favorinus x emma</i> | DD       | Cr -      | Sdsd      | Barranquitas, Peru         |
| JM1695    | <i>Heliconius erato emma</i>             | DD       | Cr -      | Sd -      | Barranquitas, Peru         |
| JM1697    | <i>Heliconius erato emma</i>             | DD       | Cr -      | Sd -      | Barranquitas, Peru         |

|        |                                          |                      |                    |
|--------|------------------------------------------|----------------------|--------------------|
| JM1699 | <i>Heliconius erato favorinus x emma</i> | <i>Dd Cr - Sdsd</i>  | Barranquitas, Peru |
| JM1700 | <i>Heliconius erato emma</i>             | <i>DD Cr - Sd -</i>  | Barranquitas, Peru |
| JM1701 | <i>Heliconius erato favorinus x emma</i> | <i>DD Cr - Sdsd</i>  | Barranquitas, Peru |
| JM1704 | <i>Heliconius erato favorinus x emma</i> | <i>Dd Cr - Sdsd</i>  | Barranquitas, Peru |
| JM1706 | <i>Heliconius erato favorinus x emma</i> | <i>Dd Cr - Sdsd</i>  | Barranquitas, Peru |
| JM1707 | <i>Heliconius erato favorinus x emma</i> | <i>DD Cr - Sdsd</i>  | Barranquitas, Peru |
| JM1708 | <i>Heliconius erato favorinus x emma</i> | <i>dd Cr - Sdsd</i>  | Barranquitas, Peru |
| JM1712 | <i>Heliconius erato emma</i>             | <i>DD Cr - Sd -</i>  | Barranquitas, Peru |
| JM1028 | <i>Heliconius erato favorinus x emma</i> | <i>Dd Cr - sdsd</i>  | Davidcillo, Peru   |
| JM1029 | <i>Heliconius erato emma</i>             | <i>DD Cr - Sd -</i>  | Davidcillo, Peru   |
| JM1031 | <i>Heliconius erato emma</i>             | <i>DD Cr - Sd -</i>  | Davidcillo, Peru   |
| JM1033 | <i>Heliconius erato emma</i>             | <i>DD Cr - Sd -</i>  | Davidcillo, Peru   |
| JM1034 | <i>Heliconius erato emma</i>             | <i>DD Cr - Sd -</i>  | Davidcillo, Peru   |
| JM1574 | <i>Heliconius erato emma</i>             | <i>DD Cr - Sd -</i>  | Davidcillo, Peru   |
| JM1575 | <i>Heliconius erato favorinus x emma</i> | <i>DD Cr cr Sdsd</i> | Davidcillo, Peru   |
| JM1576 | <i>Heliconius erato emma</i>             | <i>DD Cr - Sd -</i>  | Davidcillo, Peru   |
| JM1577 | <i>Heliconius erato favorinus x emma</i> | <i>Dd Cr - Sd -</i>  | Davidcillo, Peru   |
| JM1578 | <i>Heliconius erato emma</i>             | <i>DD Cr - Sd -</i>  | Davidcillo, Peru   |
| JM1579 | <i>Heliconius erato favorinus x emma</i> | <i>DD Cr - Sdsd</i>  | Davidcillo, Peru   |
| JM1581 | <i>Heliconius erato emma</i>             | <i>DD Cr - Sd -</i>  | Davidcillo, Peru   |
| JM1582 | <i>Heliconius erato favorinus x emma</i> | <i>DD Cr cr Sd -</i> | Davidcillo, Peru   |
| JM1589 | <i>Heliconius erato favorinus x emma</i> | <i>DD Cr - Sd -</i>  | Davidcillo, Peru   |
